# Supplementary material for: Effective Biodegradation of Aflatoxin B1 Using the Bacillus licheniformis (BL010) Strain
Source: MDPI journal article supplement (doi:10.3390/toxins10120497), 2018-11-26
Supplement: s1 [file s1]

# Supplementary Materials: Effective Biodegradation of Aflatoxin B1 Using the *Bacillus licheniformis* (BL010) Strain

Ye Wang, Haiyang Zhang, Hai Yan, Chunhua Yin, Yang Liu, Qianqian Xu, Xiaolu Liu and Zhongbao Zhang

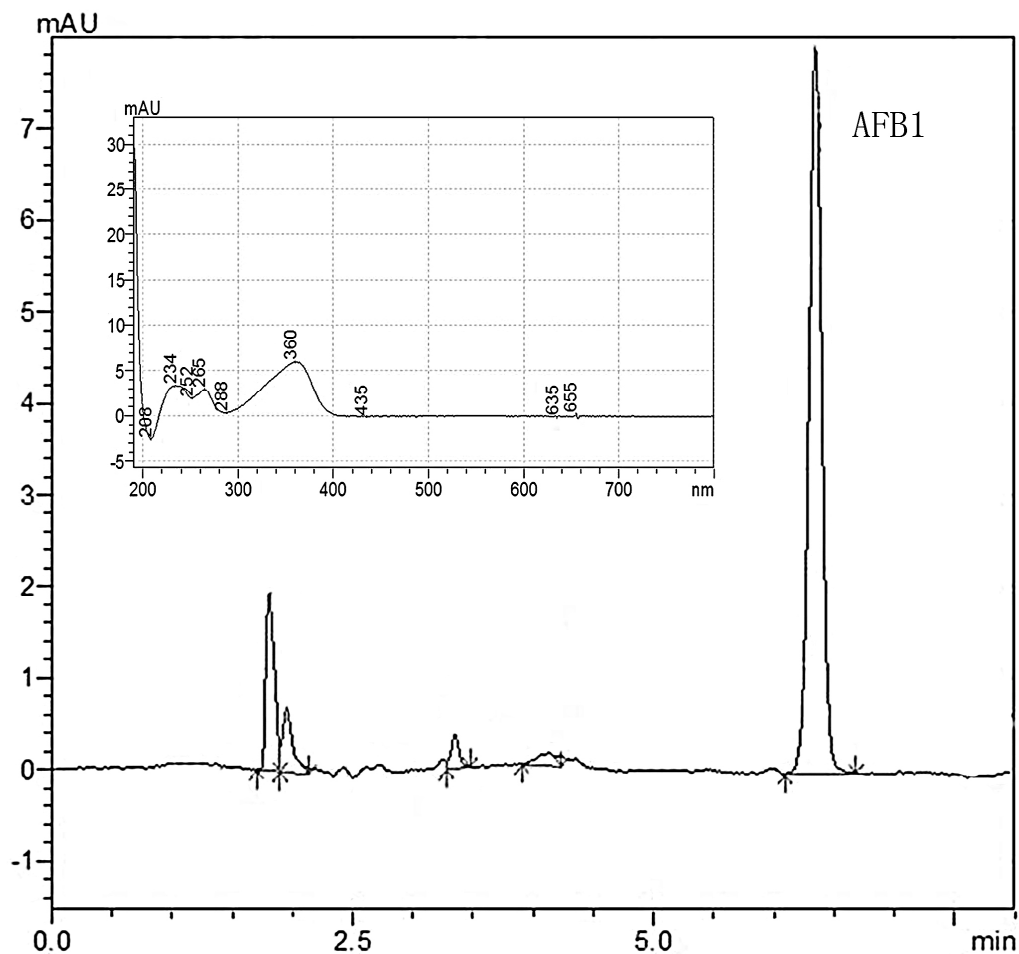

**Figure S1.** Ultraviolet scans and chromatograms of AFB1 obtained by HPLC, which shown that the maximum absorption peak of AFB1 was around 360 nm.
